# Supplementary material
Source: HighWire-hosted journal article supplement (https://bmjopenquality.bmj.com/highwire/filestream/147289/field_highwire_adjunct_files/0/bmjqs-2012-000939supp_appendix.pdf)
Supplement: bmjqs-2012-000939supp_appendix.pdf [file bmjqs-2012-000939supp_appendix.pdf]

**Supplementary materials**

|                                                                                                    |    |
|----------------------------------------------------------------------------------------------------|----|
| <b>Supplementary appendix 1.</b> Exemplary image of POFs._____                                     | 2  |
| <b>Supplementary appendix 2.</b> Details of primary analysis for primary objective (RO1)._____     | 3  |
| <b>Supplementary appendix 3.</b> Details of sensitivity analysis for primary objective (RO1)._____ | 9  |
| <b>Supplementary appendix 4.</b> Details of analyses for secondary objective (RO2)._____           | 11 |

**Supplementary appendix 1: Exemplary image of the personalised outcomes forecasts.**

Figure 1: An exemplary image of the personalised outcomes forecasts showing the estimated walking distance for an individual patient (black line). The orange dots indicate the baseline measurement and two follow-up measurements.

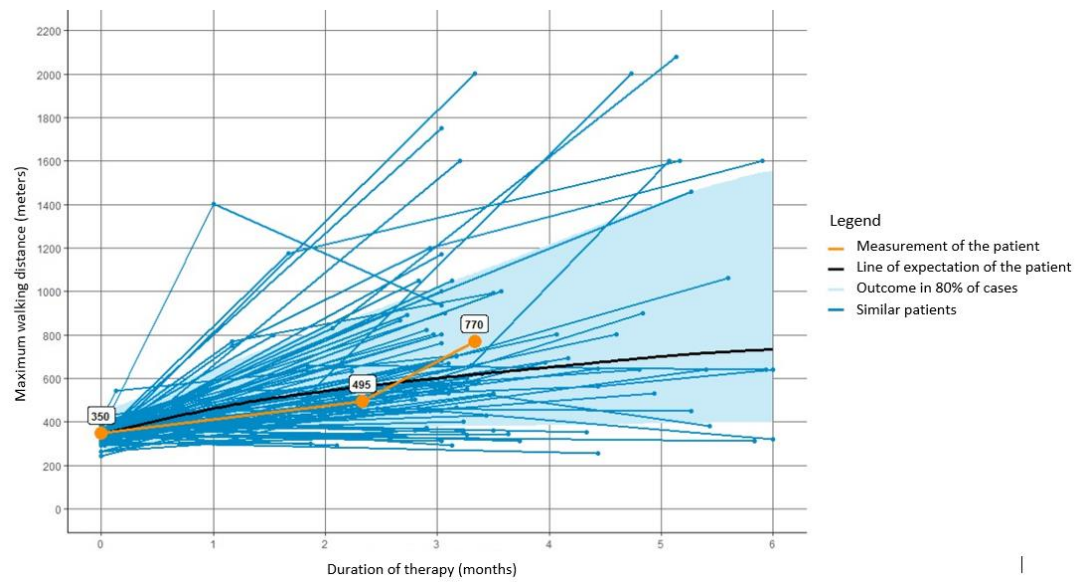

**Supplementary appendix 2: Details of primary analysis for primary objective (RO1).**

Figure 1: Flowchart of the inclusion process of data on patient outcomes gathered from electronic health records.

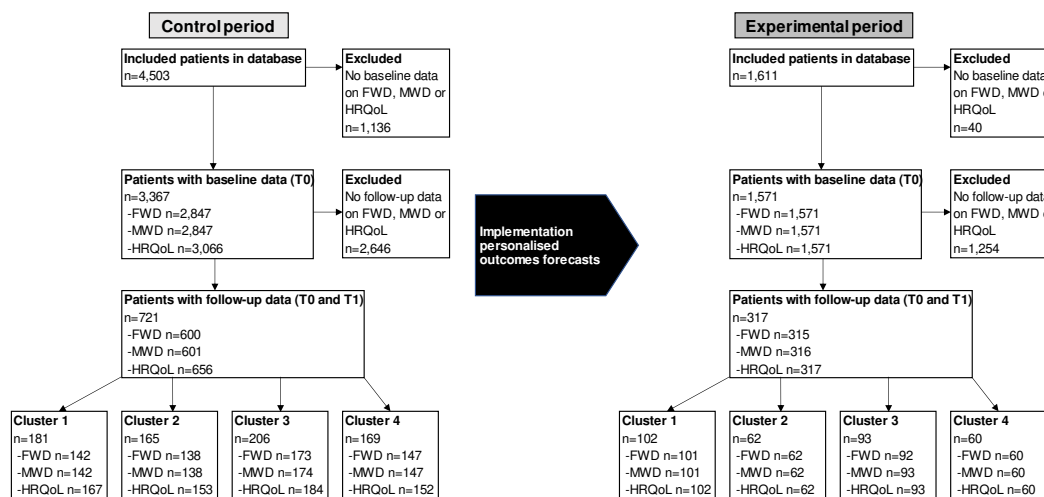

**Abbreviations:** FWD=functional walking distance; HRQoL=health-related quality of life;

MWD=maximal walking distance; n=number.

Table 1: Baseline characteristics of patients in cluster 1 with baseline and follow-up data.

| Cluster 1                            | Control period  | Experimental period |
|--------------------------------------|-----------------|---------------------|
|                                      | n=181           | n=102               |
| Age in years                         | n=181           | n=101               |
| Mean (SD)                            | 69 (8.88)*      | 73 (7.79)*          |
| Sex                                  | n=181           | n=102               |
| Male, n(%)                           | 94 (52)         | 59 (58)             |
| Female, n(%)                         | 87 (48)         | 43 (42)             |
| Body mass index (kg/m <sup>2</sup> ) | n=145           | n=102               |
| Mean (SD)                            | 26 (4.50)       | 26 (4.02)           |
| Smoking status                       | n=166           | n=102               |
| Current, n(%)                        | 67 (40)**       | 32 (31)**           |
| Former, n(%)                         | 89 (54)**       | 38 (37)**           |
| Never, n(%)                          | 10 (6)**        | 32 (31)**           |
| FWD (metres)                         | n=165           | n=102               |
| Median (IQR)                         | 240 (138 – 420) | 230 (138 – 344)     |

|                |                 |                 |
|----------------|-----------------|-----------------|
| MWD (metres)   | <i>n</i> =165   | <i>n</i> =102   |
| Median (IQR)   | 376 (210 – 610) | 330 (200 – 508) |
| HRQoL (6 – 24) | <i>n</i> =175   | <i>n</i> =102   |
| Median (IQR)   | 16 (13 – 19)    | 15 (12 – 18)    |

**Abbreviations:** BMI = body mass index; FWD = functional walking distance; HRQoL = health-related quality of life; IQR = interquartile range; MWD = maximal walking distance; *n* = number; SD = standard deviation.

\*. Significant difference ( $p < 0.05$ ) between control- and experimental group (Independent samples t-test).

\*\*. Significant difference ( $p < 0.05$ ) between control- and experimental group (Chi-Square Test).

*Table 2: Baseline characteristics of patients in cluster 2 with baseline and follow-up data.*

| <b>Cluster 2</b>                     |                                 |                                     |
|--------------------------------------|---------------------------------|-------------------------------------|
|                                      | Control period<br><i>n</i> =165 | Experimental period<br><i>n</i> =62 |
| Age in years                         | <i>n</i> =164                   | <i>n</i> =60                        |
| Mean (SD)                            | 68 (9.36)                       | 69 (8.12)                           |
| Sex                                  | <i>n</i> =165                   | <i>n</i> =62                        |
| Male, <i>n</i> (%)                   | 103 (62.4)                      | 39 (62.9)                           |
| Female, <i>n</i> (%)                 | 62 (37.6)                       | 23 (37.1)                           |
| Body mass index (kg/m <sup>2</sup> ) | <i>n</i> =141                   | <i>n</i> =62                        |
| Mean (SD)                            | 27 (4.93)                       | 27 (4.63)                           |
| Smoking status                       | <i>n</i> =156                   | <i>n</i> =62                        |
| Current, <i>n</i> (%)                | 54 (35)*                        | 16 (26)*                            |
| Former, <i>n</i> (%)                 | 94 (60)*                        | 25 (40)*                            |
| Never, <i>n</i> (%)                  | 8 (5)*                          | 21 (34)*                            |
| FWD (metres)                         | <i>n</i> =155                   | <i>n</i> =62                        |
| Median (IQR)                         | 266 (150 – 410)                 | 254 (140 – 371)                     |
| MWD (metres)                         | <i>n</i> =155                   | <i>n</i> =62                        |
| Median (IQR)                         | 363 (240 – 580)                 | 360 (217 – 582)                     |
| HRQoL (6 – 24)                       | <i>n</i> =158                   | <i>n</i> =62                        |
| Median (IQR)                         | 16 (13 – 19)                    | 15 (12 – 18)                        |

**Abbreviations:** BMI = body mass index; FWD = functional walking distance; HRQoL = health-related quality of life; IQR = interquartile range; MWD = maximal walking distance; *n* = number; SD = standard deviation.

\*. Significant difference ( $p < 0.05$ ) between control- and experimental group (Chi-Square Test).

Table 3: Baseline characteristics of patients in cluster 3 with baseline and follow-up data.

| <b>Cluster 3</b>                     |                         |                             |
|--------------------------------------|-------------------------|-----------------------------|
|                                      | Control period<br>n=206 | Experimental period<br>n=93 |
| Age in years                         | n=206                   | n=92                        |
| Mean (SD)                            | 71 (8.66)               | 70 (8.63)                   |
| Sex                                  | n=206                   | n=93                        |
| Male, n(%)                           | 118 (57)                | 58 (62)                     |
| Female, n(%)                         | 88 (43)                 | 35 (38)                     |
| Body mass index (kg/m <sup>2</sup> ) | n=175                   | n=93                        |
| Mean (SD)                            | 27 (4.45)               | 27 (4.34)                   |
| Smoking status                       | n=195                   | n=93                        |
| Current, n(%)                        | 71 (36)*                | 37 (40)*                    |
| Former, n(%)                         | 108 (55)*               | 36 (39)*                    |
| Never, n(%)                          | 16 (8)*                 | 20 (22)*                    |
| FWD (metres)                         | n=193                   | n=93                        |
| Median (IQR)                         | 300 (180 – 529)         | 310 (175 – 476)             |
| MWD (metres)                         | n=193                   | n=93                        |
| Median (IQR)                         | 440 (260 – 720)         | 400 (235 – 618)             |
| HRQoL (6 – 24)                       | n=194                   | n=93                        |
| Median (IQR)                         | 16 (13 – 20)            | 16 (12 – 18)                |

**Abbreviations:** BMI = body mass index; FWD = functional walking distance; HRQoL = health-related

quality of life; IQR = interquartile range; MWD = maximal walking distance; n = number; SD = standard deviation.

\*. Significant difference ( $p < 0.05$ ) between control- and experimental group (Chi-Square Test).

Table 4: Baseline characteristics of patients in cluster 4 with baseline and follow-up data.

| <b>Cluster 4</b>                     |                         |                             |
|--------------------------------------|-------------------------|-----------------------------|
|                                      | Control period<br>n=169 | Experimental period<br>n=60 |
| Age in years                         | n=169                   | n=60                        |
| Mean (SD)                            | 70 (8.72)               | 69 (9.50)                   |
| Sex                                  | n=169                   | n=60                        |
| Male, n(%)                           | 115 (68)                | 39 (63)                     |
| Female, n(%)                         | 54 (32)                 | 23 (37)                     |
| Body mass index (kg/m <sup>2</sup> ) | n=151                   | n=59                        |
| Mean (SD)                            | 27 (4.91)               | 26 (3.38)                   |
| Smoking status                       | n=161                   | n=60                        |
| Current, n(%)                        | 62 (39)*                | 27 (45)*                    |
| Former, n(%)                         | 84 (52)*                | 19 (32)*                    |

|                |                 |                 |
|----------------|-----------------|-----------------|
| Never, n(%)    | 15 (9)*         | 14 (32)*        |
| FWD (metres)   | <i>n</i> =161   | <i>n</i> =60    |
| Median (IQR)   | 240 (140 – 400) | 190 (130 – 398) |
| MWD (metres)   | <i>n</i> =161   | <i>n</i> =60    |
| Median (IQR)   | 350 (230 – 570) | 324 (201 – 568) |
| HRQoL (6 – 24) | <i>n</i> =164   | <i>n</i> =60    |
| Median (IQR)   | 15 (12 – 18)    | 15 (12 – 18)    |

**Abbreviations:** BMI = body mass index; FWD = functional walking distance; HRQoL = health-related

quality of life; IQR = interquartile range; MWD = maximal walking distance; n = number; SD = standard deviation.

\*. Significant difference ( $p < 0.05$ ) between control- and experimental group (Chi-Square Test).

*Table 5: Overview of the median relative changes per time point for cluster 1.*

| Cluster 1    |                   |              |                   |              |                   |              |                   |
|--------------|-------------------|--------------|-------------------|--------------|-------------------|--------------|-------------------|
| Period       | Timepoint (month) | FWD          |                   | MWD          |                   | HRQoL        |                   |
|              |                   | Patients (n) | Median change (%) | Patients (n) | Median change (%) | Patients (n) | Median change (%) |
| Control      | M0                | 97           | 89                | 97           | 64                | 112          | 20                |
| Control      | M1                | 88           | 96                | 88           | 88                | 105          | 24                |
| Control      | M2                | 90           | 307               | 90           | 256               | 97           | 23                |
| Control      | M3                | 121          | 123               | 122          | 111               | 128          | 17                |
| Control      | M4                | 111          | 112               | 111          | 76                | 110          | 17                |
| Control      | M5                | 93           | 133               | 93           | 101               | 104          | 19                |
| Experimental | M6                | 72           | 115               | 73           | 111               | 73           | 29                |
| Experimental | M7                | 57           | 124               | 57           | 106               | 57           | 33                |
| Experimental | M8                | 51           | 147               | 51           | 93                | 51           | 18                |
| Experimental | M9                | 39           | 180               | 39           | 150               | 40           | 20                |
| Experimental | M10               | 52           | 151               | 52           | 125               | 52           | 27                |
| Experimental | M11               | 44           | 94                | 44           | 96                | 44           | 29                |

**Abbreviations:** FWD = functional walking distance; HRQoL = health-related quality of life; MWD =

maximal walking distance; M = month; n = number.

Table 6: Overview of the median relative changes per time point for cluster 2.

| Cluster 2    |                   |              |                   |              |                   |              |                   |
|--------------|-------------------|--------------|-------------------|--------------|-------------------|--------------|-------------------|
| Period       | Timepoint (month) | FWD          |                   | MWD          |                   | HRQoL        |                   |
|              |                   | Patients (n) | Median change (%) | Patients (n) | Median change (%) | Patients (n) | Median change (%) |
| Control      | M0                | 97           | 150               | 97           | 119               | 112          | 14                |
| Control      | M1                | 88           | 101               | 88           | 94                | 105          | 38                |
| Control      | M2                | 90           | 97                | 90           | 72                | 97           | 17                |
| Control      | M3                | 121          | 70                | 122          | 37                | 128          | 11                |
| Control      | M4                | 111          | 99                | 111          | 58                | 110          | 11                |
| Control      | M5                | 93           | 54                | 93           | 64                | 104          | 18                |
| Experimental | M6                | 72           | 198               | 73           | 118               | 73           | 11                |
| Experimental | M7                | 57           | 149               | 57           | 103               | 57           | 43                |
| Experimental | M8                | 51           | 58                | 51           | 45                | 51           | 11                |
| Experimental | M9                | 39           | 77                | 39           | 20                | 40           | 5                 |
| Experimental | M10               | 52           | 80                | 52           | 62                | 52           | 31                |
| Experimental | M11               | 44           | 180               | 44           | 217               | 44           | 70                |

**Abbreviations:** FWD = functional walking distance; HRQoL = health-related quality of life; MWD = maximal walking distance; M = month; n = number.

Table 7: Overview of the median relative changes per time point for cluster 3.

| Cluster 3    |                   |              |                   |              |                   |              |                   |
|--------------|-------------------|--------------|-------------------|--------------|-------------------|--------------|-------------------|
| Period       | Timepoint (month) | FWD          |                   | MWD          |                   | HRQoL        |                   |
|              |                   | Patients (n) | Median change (%) | Patients (n) | Median change (%) | Patients (n) | Median change (%) |
| Control      | M0                | 97           | 75                | 97           | 60                | 112          | 25                |
| Control      | M1                | 88           | 100               | 88           | 90                | 105          | 10                |
| Control      | M2                | 90           | 61                | 90           | 47                | 97           | 13                |
| Control      | M3                | 121          | 93                | 122          | 54                | 128          | 17                |
| Control      | M4                | 111          | 133               | 111          | 109               | 110          | 16                |
| Control      | M5                | 93           | 100               | 93           | 100               | 104          | 25                |
| Experimental | M6                | 72           | 89                | 73           | 78                | 73           | 11                |
| Experimental | M7                | 57           | 83                | 57           | 65                | 57           | 25                |
| Experimental | M8                | 51           | 74                | 51           | 91                | 51           | 16                |
| Experimental | M9                | 39           | 201               | 39           | 164               | 40           | 22                |
| Experimental | M10               | 52           | 115               | 52           | 106               | 52           | 33                |
| Experimental | M11               | 44           | 150               | 44           | 106               | 44           | 15                |

**Abbreviations:** FWD = functional walking distance; HRQoL = health-related quality of life; MWD = maximal walking distance; M = month; n = number.

Table 8: Overview of the median relative changes per time point for cluster 4.

| Cluster 4    |                   |              |                   |              |                   |              |                   |
|--------------|-------------------|--------------|-------------------|--------------|-------------------|--------------|-------------------|
| Period       | Timepoint (month) | FWD          |                   | MWD          |                   | HRQoL        |                   |
|              |                   | Patients (n) | Median change (%) | Patients (n) | Median change (%) | Patients (n) | Median change (%) |
| Control      | M0                | 97           | 98                | 97           | 71                | 112          | 16                |
| Control      | M1                | 88           | 128               | 88           | 109               | 105          | 39                |
| Control      | M2                | 90           | 65                | 90           | 79                | 97           | 36                |
| Control      | M3                | 121          | 81                | 122          | 51                | 128          | 24                |
| Control      | M4                | 111          | 69                | 111          | 67                | 110          | 29                |
| Control      | M5                | 93           | 167               | 93           | 121               | 104          | 21                |
| Experimental | M6                | 72           | 99                | 73           | 64                | 73           | 8                 |
| Experimental | M7                | 57           | 156               | 57           | 152               | 57           | 10                |
| Experimental | M8                | 51           | 70                | 51           | 57                | 51           | 20                |
| Experimental | M9                | 39           | 148               | 39           | 125               | 40           | 22                |
| Experimental | M10               | 52           | 79                | 52           | 89                | 52           | 31                |
| Experimental | M11               | 44           | 270               | 44           | 127               | 44           | 29                |

**Abbreviations:** FWD = functional walking distance; HRQoL = health-related quality of life; MWD =

maximal walking distance; M = month; n = number.



**Supplementary appendix 3: Details of sensitivity analysis for primary objective (RO1).***Figure 1: Flowchart of the inclusion process of data on patient outcomes gathered from electronic health records.*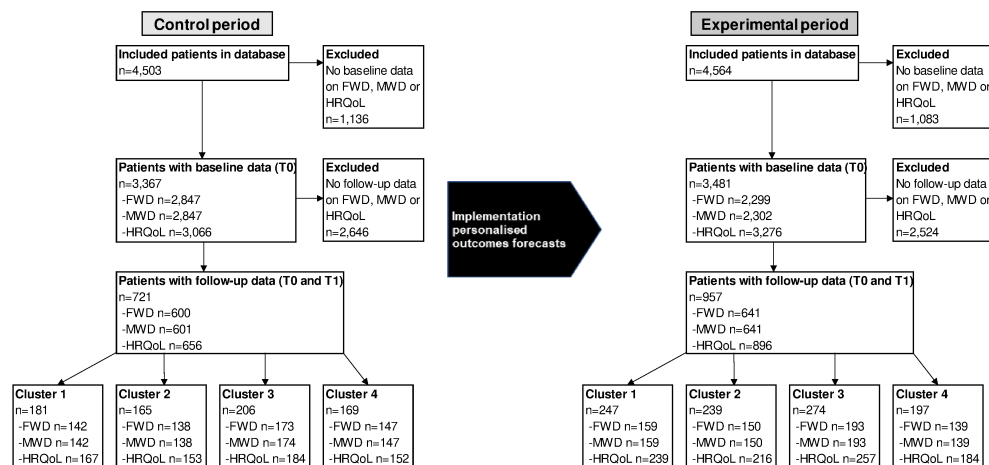

**Abbreviations:** FWD=functional walking distance; HRQoL=health-related quality of life; MWD=maximal walking distance; n=number.

*Table 1: Baseline characteristics of patients with baseline and follow-up data.*

|                          | Control period<br>n=721 | Experimental period<br>n=957 |
|--------------------------|-------------------------|------------------------------|
| Age in years             | n=720                   | n=955                        |
| Mean (SD)                | 70 (8.93)               | 70 (9.19)                    |
| Sex                      | n=721                   | n=957                        |
| Male, n(%)               | 430 (60)                | 590 (62)                     |
| Female, n(%)             | 291 (40)                | 367 (38)                     |
| BMI (kg/m <sup>2</sup> ) | n=612                   | n=705                        |
| Mean (SD)                | 27 (4.69)               | 26 (4.45)                    |
| Smoking status           | n=678                   | n=774                        |
| Current, n(%)            | 254 (38)*               | 268 (35)*                    |
| Former, n(%)             | 375 (55)*               | 421 (54)*                    |
| Never, n(%)              | 49 (7)*                 | 85 (11)*                     |
| FWD (metres)             | n=674                   | n=761                        |
| Median (IQR)             | 260 (157 – 432)         | 250 (150 – 420)              |
| MWD (metres)             | n=674                   | n=762                        |
| Median (IQR)             | 380 (235 – 620)         | 350 (218 – 563)              |
| HRQoL (6 – 24)           | n=691                   | n=927                        |
| Median (IQR)             | 16 (13 – 19)*           | 15 (12 – 18)*                |

**Abbreviations:** BMI = body mass index; FWD = functional walking distance; HRQoL = health-related quality of life; IQR = interquartile range; MWD = maximal walking distance; n = number; SD = standard deviation.

\*. Significant difference (p < 0.05) between control- and experimental group.

Figure 2: Forest plots of differences before and after the implementation of the POFs on patient outcomes. Results are based on pooled meta-analyses of mean differences per cluster.

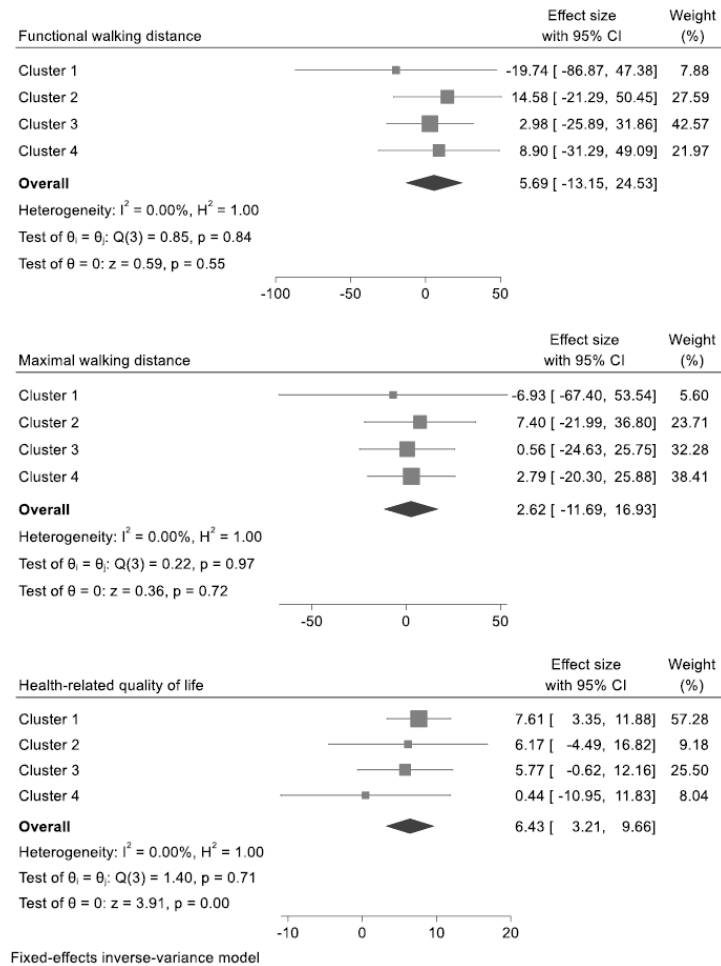

**Supplementary appendix 4: Details of analyses for secondary objective (RO2).**

Figure 1: Flowchart of the inclusion process of participants and observations.

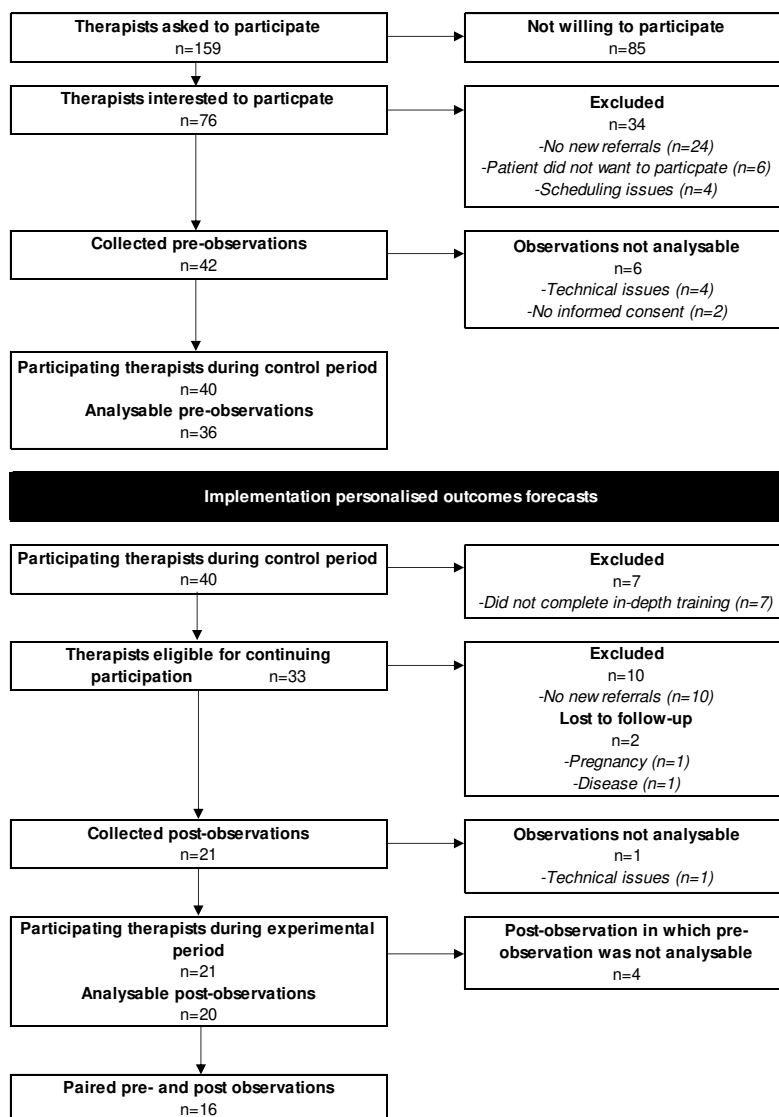

Figure 2: Visualisation of OPTION-5 total scores.

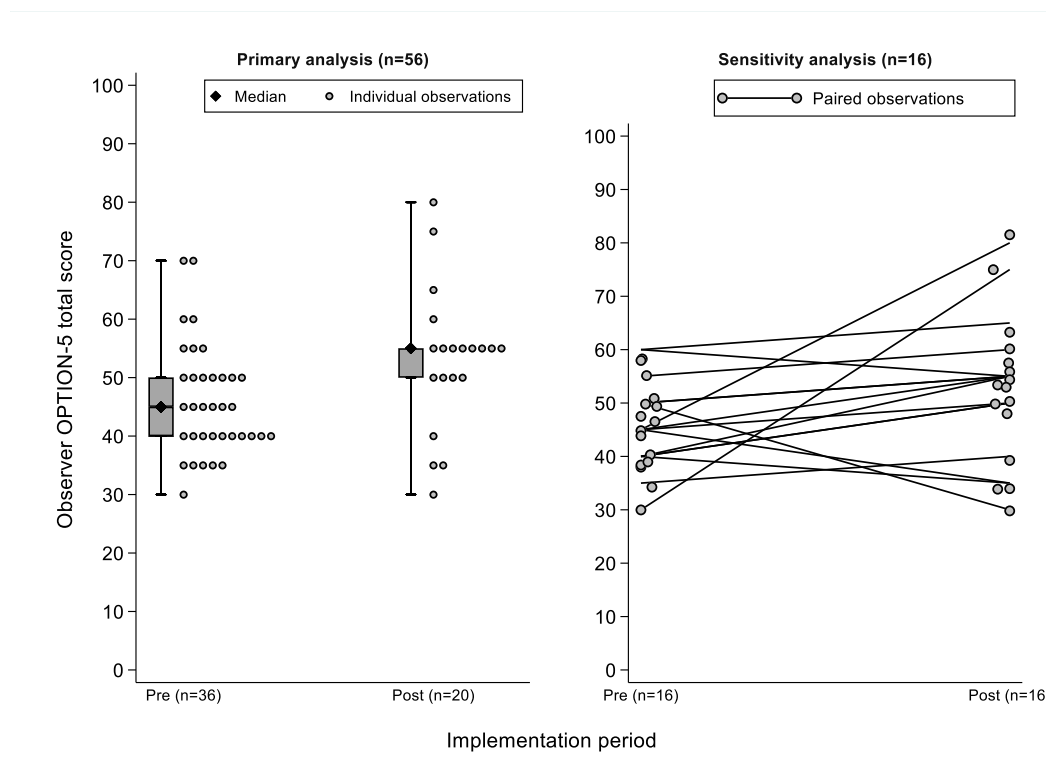

Table 1: Overview of OPTION-5 item scores for primary analysis.

|                                 | Score 0<br>(n (%)) | Score 1<br>(n (%)) | Score 2<br>(n (%)) | Score 3<br>(n (%)) | Score 4<br>(n (%)) |
|---------------------------------|--------------------|--------------------|--------------------|--------------------|--------------------|
| <b>Pre-observations</b>         |                    |                    |                    |                    |                    |
| (n=36)                          |                    |                    |                    |                    |                    |
| Item 1: Presenting options      | 0 (0)              | 4 (11)             | 26 (72)            | 5 (14)             | 1 (3)              |
| Item 2: Forming partnership     | 0 (0)              | 31 (86)            | 3 (8)              | 2 (6)              | 0 (0)              |
| Item 3: Informing about options | 0 (0)              | 21 (58)            | 15 (42)            | 0 (0)              | 0 (0)              |
| Item 4: Eliciting preferences   | 0 (0)              | 2 (6)              | 20 (55)            | 11 (31)            | 3 (8)              |
| Item 5: Integrating preferences | 0 (0)              | 13 (36)            | 9 (25)             | 13 (36)            | 1 (3)              |
| <b>Post-observations</b>        |                    |                    |                    |                    |                    |
| (n=20)                          |                    |                    |                    |                    |                    |
| Item 1: Presenting options      | 0 (0)              | 2 (10)             | 11 (55)            | 7 (35)             | 0 (0)              |
| Item 2: Forming partnership     | 0 (0)              | 15 (75)            | 5 (25)             | 0 (0)              | 0 (0)              |
| Item 3: Informing about options | 1 (5)              | 12 (60)            | 4 (20)             | 2 (10)             | 1 (5)              |
| Item 4: Eliciting preferences   | 0 (0)              | 3 (15)             | 3 (15)             | 11 (55)            | 3 (15)             |
| Item 5: Integrating preferences | 0 (0)              | 1 (5)              | 3 (15)             | 13 (65)            | 3 (15)             |

Table 2: Overview of OPTION-5 item scores for sensitivity analysis.

|                                 | <b>Score 0</b><br>(n (%)) | <b>Score 1</b><br>(n (%)) | <b>Score 2</b><br>(n (%)) | <b>Score 3</b><br>(n (%)) | <b>Score 4</b><br>(n (%)) |
|---------------------------------|---------------------------|---------------------------|---------------------------|---------------------------|---------------------------|
| <b>Pre-observations</b>         |                           |                           |                           |                           |                           |
| (n=16)                          |                           |                           |                           |                           |                           |
| Item 1: Presenting options      | 0 (0)                     | 3 (19)                    | 10 (63)                   | 2 (13)                    | 1 (6)                     |
| Item 2: Forming partnership     | 0 (0)                     | 14 (88)                   | 1 (6)                     | 1 (6)                     | 0 (0)                     |
| Item 3: Informing about options | 0 (0)                     | 7 (44)                    | 9 (56)                    | 0 (0)                     | 0 (0)                     |
| Item 4: Eliciting preferences   | 0 (0)                     | 1 (6)                     | 11 (69)                   | 4 (25)                    | 0 (0)                     |
| Item 5: Integrating preferences | 0 (0)                     | 5 (31)                    | 4 (25)                    | 7 (44)                    | 0 (0)                     |
| <b>Post-observations</b>        |                           |                           |                           |                           |                           |
| (n=16)                          |                           |                           |                           |                           |                           |
| Item 1: Presenting options      | 0 (0)                     | 1 (6)                     | 8 (50)                    | 7 (44)                    | 0 (0)                     |
| Item 2: Forming partnership     | 0 (0)                     | 12 (75)                   | 4 (25)                    | 0 (0)                     | 0 (0)                     |
| Item 3: Informing about options | 0 (0)                     | 9 (56)                    | 3 (19)                    | 2 (13)                    | 1 (6)                     |
| Item 4: Eliciting preferences   | 0 (0)                     | 3 (19)                    | 3 (19)                    | 8 (50)                    | 2 (13)                    |
| Item 5: Integrating preferences | 0 (0)                     | 1 (6)                     | 3 (19)                    | 10 (63)                   | 2 (13)                    |
